# Supplementary material for: Characterization of the binding interactions between EvaGreen dye and dsDNA
Source: Royal Society of Chemistry journal article supplement (doi:10.1039/c7cp06058k), 2018-01-01
Supplement: c7cp06058k1.pdf [file c7cp06058k1.pdf]

**Supplementary Information**  
**Characterization of the binding interactions between EvaGreen dye and dsDNA**

L. C. T. Shoute and G. R. Loppnow\*

Department of Chemistry, University of Alberta, Edmonton, AB T6G 2G2 Canada

Hill analysis: To gain insight into the binding interaction between the duplex DNA (poly-dA<sub>17</sub>•poly-dT<sub>17</sub>) and EG, we have prepared and recorded the fluorescence spectra of solutions containing both dsDNA and EG. The traditional graphical representation of a binding isotherm is obtained by plotting the fractional saturation binding ( $\theta$ ) of ligand to the receptor, calculated as a function of the free ligand concentration present in the solution at equilibrium. Assuming the fluorescence intensity is linearly proportional to the number of bound EG to the duplex DNA, the measured fluorescence intensity can be used<sup>1-5</sup> to calculate the fraction of EG bound to duplex DNA as a function of free equilibrium EG concentration ( $[EG]_{eq}$ ). The fluorescence intensity as a function of  $[EG]_{eq}$  is shown in Figure 1S for the solution containing poly-dA<sub>17</sub>•poly-dT<sub>17</sub> dsDNA and EG. The sigmoidal shape of the plot indicates cooperative binding of EG to dsDNA.

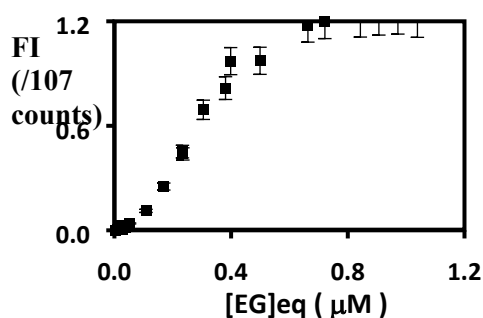

Figure 1S. Fluorescence intensity versus  $[EG]_{eq}$  plot for intercalation of EG in 0.2  $\mu\text{M}$  duplex poly-dA<sub>17</sub>•poly-dT<sub>17</sub> (10 mM Tris, 1 mM EDTA, 10 mM NaCl, pH 7.5). The data points represent the average (point) and standard deviation (error bars) from 4 separate experiments.

The fraction of EG bound or fractional saturation ( $\theta$ ) can be found from the fluorescence intensity as follows:

$$\theta = \frac{F_{obs} - F}{F_{max} - F} = \frac{\text{concentration of bound EG}}{\text{concentration of binding sites}} \quad (1)$$

Where  $F_{obs}$  and  $F$  are the observed fluorescence intensity at 532 nm of EG in the presence and the absence of 0.2  $\mu\text{M}$  duplex DNA, respectively, and  $F_{max}$  is the maximum fluorescence attained at binding saturation. Figure 2S displays the binding isotherm obtained for the binding interaction of EG with duplex poly-dA<sub>17</sub>•poly-dT<sub>17</sub>.

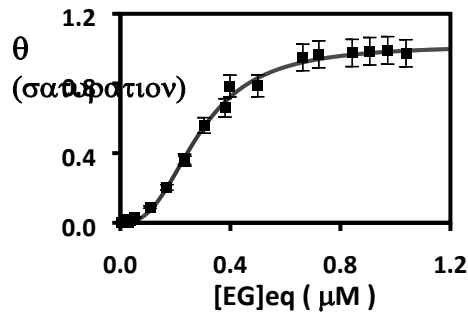

Figure 2S. Binding isotherm for the intercalation of EG into 0.2  $\mu\text{M}$  duplex poly-dA<sub>17</sub>•poly-dT<sub>17</sub> (10 mM Tris, 1 mM EDTA, 10 mM NaCl, pH 7.5). The data points represent the average (point)

and standard deviation (error bars) from 4 separate experiments. The curve is the fit of the experimental data to the Hill equation (Eq. 5) using the parameters  $K_a^m = (3.5 \pm 0.0) \times 10^6$  and  $m = 2.7 \pm 0.2$ .

To quantify the binding of EG to dsDNA, a simple equilibrium model first introduced by Hill and co-workers<sup>6-11</sup> was used as follows:

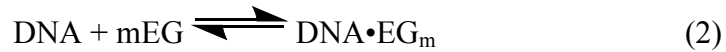

$$K_d^m = \frac{[\text{DNA}]_{eq} \times [\text{EG}]_{eq}^m}{[\text{DNA} \bullet \text{EG}_m]_{eq}} \quad (3)$$

In this model, the fractional saturation of the binding sites ( $\theta$ ) in duplex DNA available for occupation by the EG dyes is given by

$$\theta = \frac{m[\text{DNA} \bullet \text{EG}_m]_{eq}}{[\text{DNA}]_{eq,tot}} \quad (4)$$

The fluorescence intensity from the dsDNA•EG<sub>m</sub> complex is proportional to the number of bound EG, and [DNA]<sub>eq,tot</sub> refers to the dsDNA concentrations. In this model, duplex DNA is described as a system with a one-dimensional array of binding sites. Substitution of Equation 3 into Equation 4 and rearrangement yields the sigmoidal form of the Hill equation describing the ligand binding isotherm,

$$\theta = \frac{[EG]_{eq}^m}{K_d^m + [EG]_{eq}^m} \quad (5)$$

Figure 2S shows that Equation 5 fits the experimentally observed isotherm with  $m=2.7$ , indicating positive cooperativity for the intercalation binding of EG into duplex poly-dA<sub>17</sub>•poly-dT<sub>17</sub>. Further, Equation 5 can be easily rearranged to the well-known linear forms of the Hill equation,

$$\frac{\theta}{1 - \theta} = \frac{[EG]_{eq}^m}{K_d^m} \quad (6)$$

$$\log \frac{\theta}{1 - \theta} = m \log [EG]_{eq} - m \log K_d \quad (7)$$

Although the Hill equation can be used to determine binding parameters such as the affinity constant and the number of ligands bound to duplex DNA, it rarely correctly describes the binding interaction; the Hill model, as presented in Eq. 7, is linear only for two limiting cases, completely non-cooperative binding when  $m = 1$  and infinitely cooperative binding where the binding of the first ligand imparts infinitely high affinity for the subsequent ligands, i. e. the contributions of the intermediate complexes or partially occupied sites (DNA•EG<sub>1</sub>, DNA•EG<sub>2</sub>,.....DNA•EG<sub>m-1</sub>) are negligible and the system is dominantly in the form of either DNA or the fully-bound DNA•EG<sub>m</sub> complex ("all-or-none" binding). Hence, the Hill model is useful only as a test for the deviation from a simple binding model and for detecting the presence of cooperativity (positive or negative) in the binding<sup>6-11</sup>.

## References:

1. Dragan, A. I. *et al.* Characterization of PicoGreen interaction with dsDNA and the origin of its fluorescence enhancement upon binding. *Biophys. J.* **99**, 3010–3019 (2010).
2. Paul, P. & Suresh Kumar, G. Thermodynamics of the DNA binding of phenothiazinium dyes toluidine blue O, azure A and azure B. *J. Chem. Thermodyn.* **64**, 50–57 (2013).
3. Dragan, A. I. *et al.* SYBR Green I: Fluorescence properties and interaction with DNA. *J. Fluoresc.* **22**, 1189–1199 (2012).
4. Ma-Ham, A. *et al.* Apoferritin-based nanomedicine platform for drug delivery: equilibrium binding study of daunomycin with DNA. *J. Mater. Chem.* **21**, 8700 (2011).
5. McMasters, S. & Kelly, L. A. Sequence-dependent interactions of cationic naphthalimides and polynucleotides. *Photochem. Photobiol.* **83**, 889–896 (2007).
6. Hill, A. V. The possible effects of the aggregation of the molecules of haemoglobin on its dissociation curves. *J. Physiol.* **40**, iv–vii (1910).
7. Cattoni, D. I., Chara, O., Kaufman, S. B. & Flecha, F. L. G. Cooperativity in binding processes: New insights from phenomenological modeling. *PLoS One* **10**, 1–14 (2015).
8. Eaton, W. A., Henry, E. R., Hofrichter, J. & Mozzarelli, A. Is cooperative oxygen binding by hemoglobin really understood? *Rend. Lincei* **17**, 147–162 (2006).
9. Gesztelyi, R. *et al.* The Hill equation and the origin of quantitative pharmacology. *Arch. Hist. Exact Sci.* **66**, 427–438 (2012).
10. Goutelle, S. *et al.* The Hill equation: A review of its capabilities in pharmacological modelling. *Fundam. Clin. Pharmacol.* **22**, 633–648 (2008).
11. Lolkema, J. S. & Slotboom, D.-J. The Hill analysis and co-ion-driven transporter kinetics. *J. Gen. Physiol.* **145**, 565–74 (2015).
